# Supplementary material for: Improvement of IFNγ ELISPOT Performance Following Overnight Resting of Frozen PBMC Samples Confirmed Through Rigorous Statistical Analysis
Source: MDPI journal article supplement (doi:10.3390/cells4010001), 2014-12-24
Supplement: s1 [file s1]

## Supplementary Information

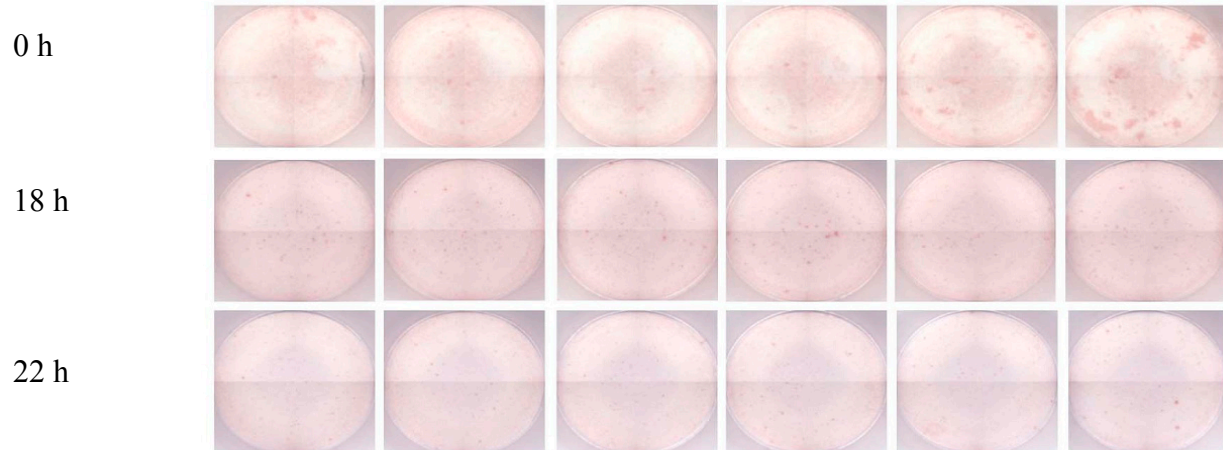

**Figure S1.** Artifacts in background wells can be cleaned by overnight PBMC resting. PBMC from H3 donor were no rested (0 h) or rested 18 h or 22 h previous to Elispot testing Shown pictures are from background control wells (no peptide added). Different donor vials were used for 0, 18 or 22 h resting.
