# Supplementary material for: Improvement of IFNγ ELISPOT Performance Following Overnight Resting of Frozen PBMC Samples Confirmed Through Rigorous Statistical Analysis
Source: MDPI journal article supplement (doi:10.3390/cells4010001), 2014-12-24
Supplement: s1 [file s1]

| # | Required | If available | Optional |
|---|----------|--------------|----------|
|---|----------|--------------|----------|

## MIANKA & MIATA Sub-Modules

|                                                    |                                     |                                     |                                                                                          |
|----------------------------------------------------|-------------------------------------|-------------------------------------|------------------------------------------------------------------------------------------|
| <b>Module 1 - Sample</b>                           |                                     |                                     |                                                                                          |
| <b>Module 1A - Donor</b>                           |                                     |                                     |                                                                                          |
| 1.1                                                | <input checked="" type="checkbox"/> |                                     | Essential donor info                                                                     |
| <b>Module 1B Source</b>                            |                                     |                                     |                                                                                          |
| 1.2                                                | <input checked="" type="checkbox"/> |                                     | Source of cell material                                                                  |
| 1.3                                                | <input checked="" type="checkbox"/> |                                     | Collection methodology                                                                   |
| 1.4                                                |                                     | <input checked="" type="checkbox"/> | anti-coagulant, if available                                                             |
| 1.5                                                |                                     | <input checked="" type="checkbox"/> | Transportation/storage conditions for unprocessed samples, if available                  |
| 1.6                                                | <input checked="" type="checkbox"/> |                                     | Cell processing methodology                                                              |
| 1.7                                                |                                     | <input checked="" type="checkbox"/> | Median time and ranges from sample collection until end of cell processing, if available |
| 1.8                                                |                                     | <input checked="" type="checkbox"/> | Cut-offs, if used                                                                        |
| <b>Module 1C - Cryopreservation and Storage</b>    |                                     |                                     |                                                                                          |
| 1.9                                                | <input checked="" type="checkbox"/> |                                     | Fresh or cryopreserved                                                                   |
|                                                    |                                     | <input checked="" type="checkbox"/> | If cryopreserved                                                                         |
| 1.10                                               | <input checked="" type="checkbox"/> |                                     | devices used                                                                             |
| 1.11                                               | <input checked="" type="checkbox"/> |                                     | freezing process                                                                         |
| 1.12                                               | <input checked="" type="checkbox"/> |                                     | medium used for freezing                                                                 |
| 1.13                                               |                                     | <input checked="" type="checkbox"/> | Median time and temperature for each transportation and storage step, if available       |
| 1.14                                               |                                     | <input checked="" type="checkbox"/> | Cut-offs, if used                                                                        |
| <b>Module 1D - Cell Counting</b>                   |                                     |                                     |                                                                                          |
| 1.15                                               | <input checked="" type="checkbox"/> |                                     | Median cell yield and viability (where available)                                        |
| 1.16                                               |                                     | <input checked="" type="checkbox"/> | before freezing                                                                          |
| 1.17                                               |                                     | <input checked="" type="checkbox"/> | after thawing                                                                            |
| 1.18                                               |                                     | <input checked="" type="checkbox"/> | after overnight resting                                                                  |
| 1.19                                               |                                     | <input checked="" type="checkbox"/> | Cut-offs, if used                                                                        |
| 1.20                                               | <input checked="" type="checkbox"/> |                                     | Cell counting methodology                                                                |
| 1.21                                               |                                     | <input checked="" type="checkbox"/> | Optional: Additional assessments                                                         |
| <b>Module 2 - Assay</b>                            |                                     |                                     |                                                                                          |
| <b>Module 2A - Medium/serum</b>                    |                                     |                                     |                                                                                          |
| 2.1                                                | <input checked="" type="checkbox"/> |                                     | Medium/(serum) details                                                                   |
| 2.2                                                | <input checked="" type="checkbox"/> |                                     | Pretesting info                                                                          |
| <b>Module 2B - Assay</b>                           |                                     |                                     |                                                                                          |
| 2.3                                                |                                     | <input checked="" type="checkbox"/> | Treatment procedures of cells prior to assay, if applicable                              |
| 2.4                                                |                                     | <input checked="" type="checkbox"/> | Sufficient assay details                                                                 |
| <b>Module 2C - Controls</b>                        |                                     |                                     |                                                                                          |
| 2.5                                                | <input checked="" type="checkbox"/> |                                     | Internal assay controls                                                                  |
| 2.6                                                |                                     | <input checked="" type="checkbox"/> | Acceptance criteria, if available                                                        |
| 2.7                                                |                                     | <input checked="" type="checkbox"/> | External reference samples, if used                                                      |
| 2.8                                                |                                     | <input checked="" type="checkbox"/> | Assay acceptance criteria, if available                                                  |
| <b>Module 3 - Data Acquisition</b>                 |                                     |                                     |                                                                                          |
| <b>Module 3A - Equipment and software</b>          |                                     |                                     |                                                                                          |
| 3.1                                                | <input checked="" type="checkbox"/> |                                     | Equipment and software version                                                           |
| 3.2                                                |                                     | <input checked="" type="checkbox"/> | Basic equipment settings, if available                                                   |
| <b>Module 3B - Acquisition Strategy and Gating</b> |                                     |                                     |                                                                                          |
| 3.3                                                | <input checked="" type="checkbox"/> |                                     | Detailed gating strategy or strategy for establishing spot detection parameters          |
| 3.4                                                | <input checked="" type="checkbox"/> |                                     | Representative data set                                                                  |
| 3.5                                                |                                     | <input checked="" type="checkbox"/> | Mean, median, ranges of event counts for relevant populations, if available              |
| 3.6                                                |                                     | <input checked="" type="checkbox"/> | Optional: Unusual strategies explained                                                   |
| 3.7                                                |                                     | <input checked="" type="checkbox"/> | Optional: Review of raw data                                                             |
| <b>Module 4 - Results</b>                          |                                     |                                     |                                                                                          |
| <b>Module 4A - Raw data</b>                        |                                     |                                     |                                                                                          |
| 4.1                                                |                                     | <input checked="" type="checkbox"/> | Background and ag-specific reactivity levels, if available                               |
| 4.2                                                |                                     | <input checked="" type="checkbox"/> | Cut-off specifications and # of tests OOS, if available                                  |
| 4.3                                                | <input checked="" type="checkbox"/> |                                     | Accessibility of raw data addressed?                                                     |
| <b>Module 4B - Response determination</b>          |                                     |                                     |                                                                                          |
| 4.4                                                | <input checked="" type="checkbox"/> |                                     | Definition of positive reactivity (above background) including tests applied             |
| 4.5                                                |                                     | <input checked="" type="checkbox"/> | Parameters, software and version used for response determination, if applicable          |
| 4.6                                                | <input checked="" type="checkbox"/> |                                     | Response definition predefined or post-hoc?                                              |
| 4.7                                                |                                     | <input checked="" type="checkbox"/> | Definition of response induced by treatment, if applicable                               |
| 4.8                                                |                                     | <input checked="" type="checkbox"/> | Any data excluded and why, if applicable?                                                |
| 4.9                                                |                                     | <input checked="" type="checkbox"/> | Optional: Why test was used                                                              |
| <b>Module 5</b>                                    |                                     |                                     |                                                                                          |
| <b>Module 5A - General Lab Operation</b>           |                                     |                                     |                                                                                          |
| 5.1                                                | <input checked="" type="checkbox"/> |                                     | Guidance of lab operations                                                               |
| 5.2                                                |                                     | <input checked="" type="checkbox"/> | Laboratory accreditations and certifications, if available                               |
| 5.3                                                |                                     | <input checked="" type="checkbox"/> | Optional: Details on audits                                                              |
| <b>Module 5B - Standardization</b>                 |                                     |                                     |                                                                                          |
| 5.4                                                | <input checked="" type="checkbox"/> |                                     | Status of protocols                                                                      |
| <b>Module 5C - Qualification/Validation</b>        |                                     |                                     |                                                                                          |
| 5.5                                                | <input checked="" type="checkbox"/> |                                     | Status of assays                                                                         |
| 5.6                                                |                                     | <input checked="" type="checkbox"/> | Optional: Specific performance criteria                                                  |
